# Supplementary material for: Paper-based microfluidic devices based on 3D network polymer hydrogel for the determination of glucose in human whole blood
Source: Royal Society of Chemistry journal article supplement (doi:10.1039/c9ra04278d), 2019-01-01
Supplement: c9ra04278d1.pdf [file c9ra04278d1.pdf]

## Supporting Information

### **Paper-based microfluidic devices based on 3D network polymer hydrogel for the determination of glucose in human whole blood**

Rong-Yu He,<sup>a</sup> Hsin-Yi Tseng,<sup>a</sup> Hsia-An Lee,<sup>a</sup> Yu-Ci Liu,<sup>a</sup> Igor O. Koshevoy,<sup>b</sup> Sheng-Wei Pan<sup>\*c,d,e</sup> and Mei-Lin Ho<sup>\*a</sup>

<sup>a</sup> Department of Chemistry, Soochow University, No. 70, LinShih Rd., Shih-Lin, Taipei 11102, Taiwan. E-mail: meilin\_ho@scu.edu.tw (M.-L. Ho)

<sup>b</sup> University of Eastern Finland, Department of Chemistry, 80101, Joensuu, Finland

<sup>c</sup> Department of Chest Medicine, Taipei Veterans General Hospital, Taipei 11217, Taiwan. E-mail: swpan25@gmail.com (S.-W. Pan)

<sup>d</sup> School of Medicine, National Yang-Ming University, Taipei 11221, Taiwan

<sup>e</sup> Institute of Public Health, National Yang-Ming University, Taipei 11221, Taiwan

### **Supplementary materials:**

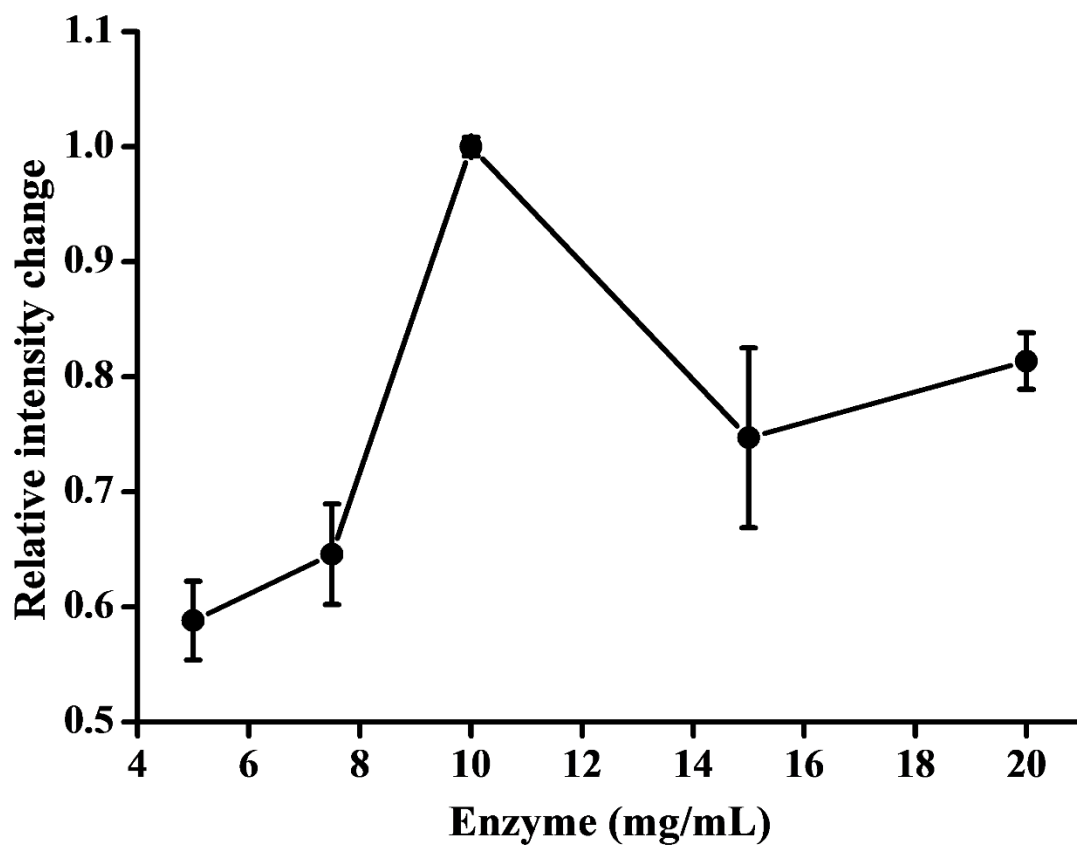

**Figure S1.** Emission intensity change of PAM hydrogels with different concentrations of enzyme (pH = 6). Error bars represent the SD of three independent experiments.

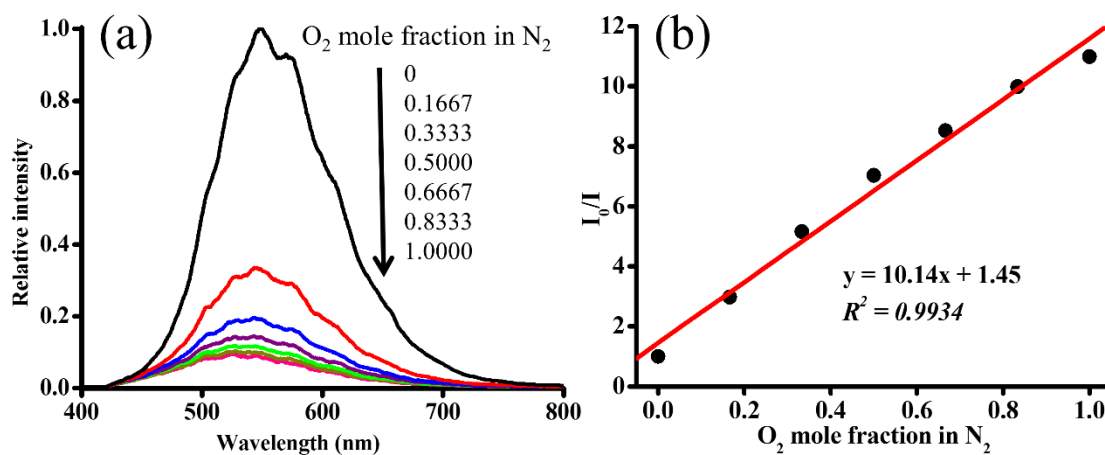

**Figure S2.** (a) Emission spectra for Cu4c excited at 406 nm under varying concentrations of O<sub>2</sub> in N<sub>2</sub>. (b) Stern-Volmer plots versus mole fraction of O<sub>2</sub> in N<sub>2</sub> for Cu4c; the line is the appropriate linear regression fit with  $R^2 = 0.9934$ .

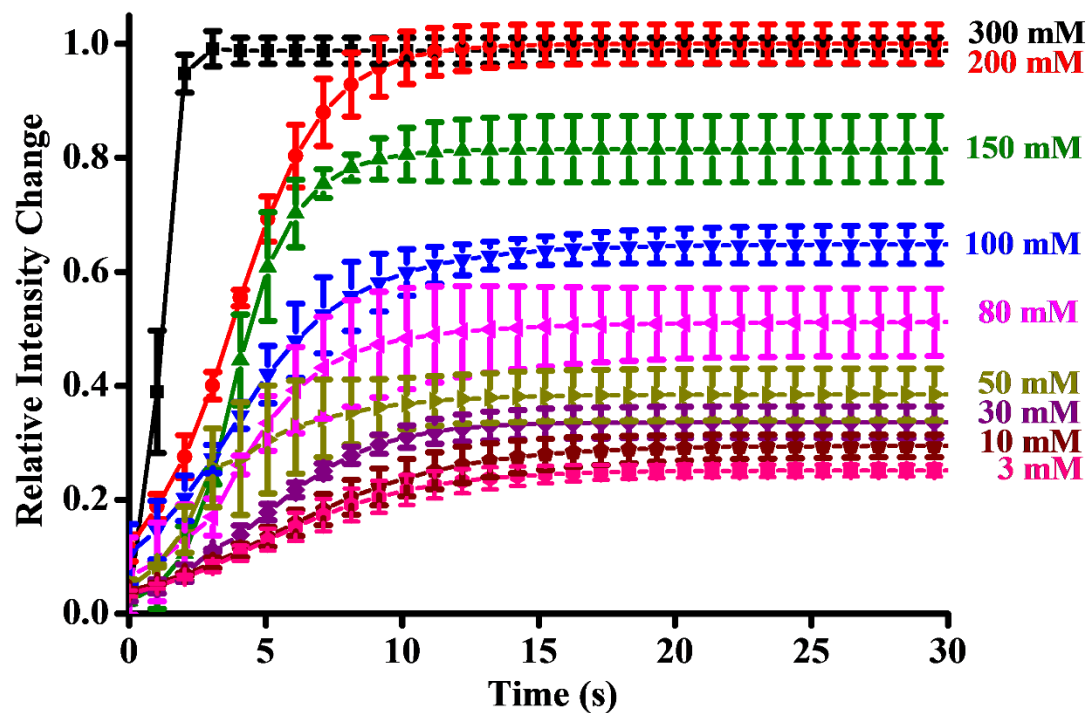

**Figure S3.** Effect of the glucose level on the emission intensity change. Error bars represent the SD of three independent experiments.

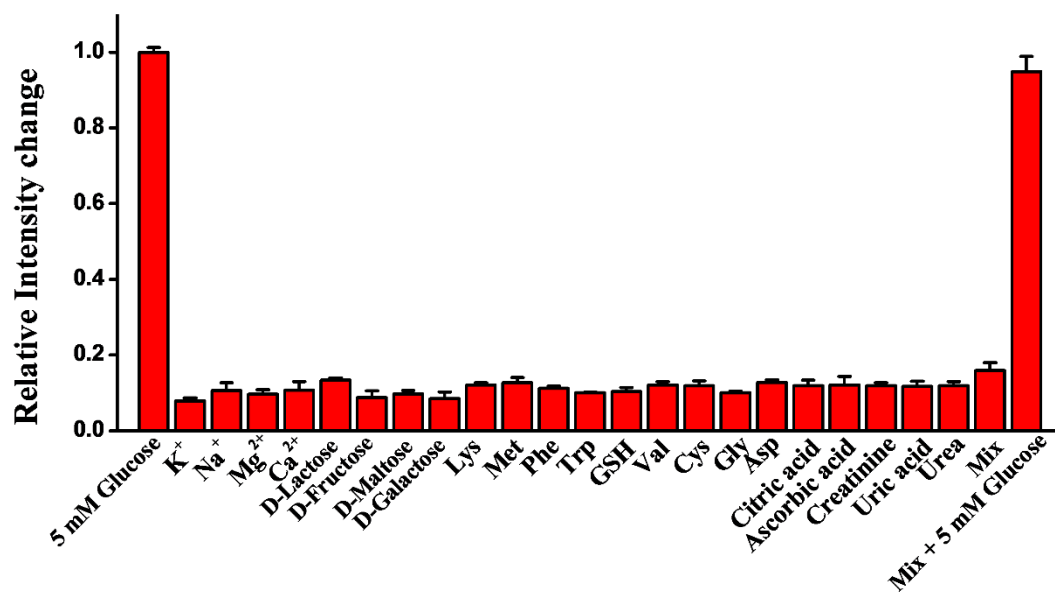

**Figure S4.** Selectivity of the 3D luminescent network hydrogel against other potential interferent species in blood. Mix means the coexistence of all interferents. Error bars represent the SD of three independent experiments.

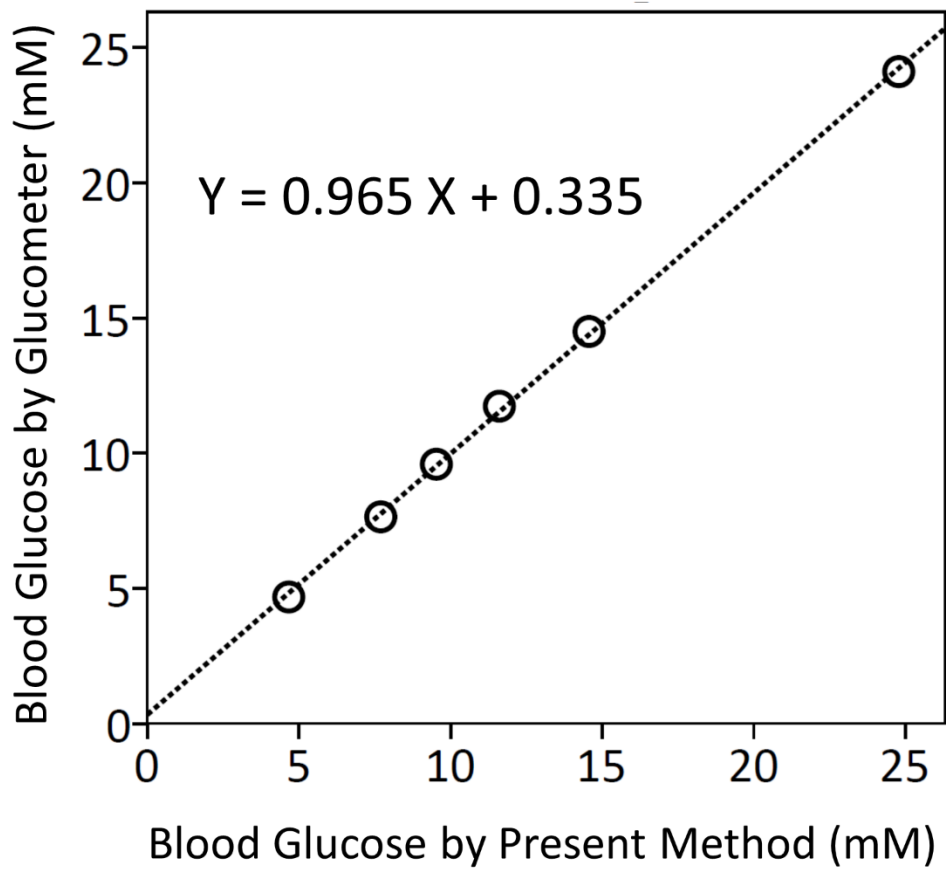

**Figure S5.** The fitted linear regression line of glucose levels measured by the present method versus those measured by glucometer (6 blood samples).
